# Supplementary material for: The Association of Higher Plasma Macrophage Migration Inhibitory Factor Levels with Lower Bone Mineral Density and Higher Bone Turnover Rate in Postmenopausal Women
Source: PubMed Central journal article supplement — Endocrinol Metab (Seoul). 2016 Jul 26;31(3):454–61. doi: 10.3803/EnM.2016.31.3.454 (PMC5053059; doi:10.3803/enm.2016.31.3.454), 2016-07-26
Supplement: enm-31-454-s001.pdf [file enm-31-454-s001.pdf]

**Supplemental Table S1.** Logistic Regression Analyses to Generate ORs of Covariates Included in the Final Multivariable Adjusted Model for the Risk of Osteoporosis

| Covariate                            | OR (95% CI)         | P value            |
|--------------------------------------|---------------------|--------------------|
| Age                                  | 1.061 (1.005–1.119) | 0.031 <sup>a</sup> |
| Body mass index                      | 0.953 (0.865–1.051) | 0.336              |
| Current smoking                      | 1.266 (0.194–8.268) | 0.805              |
| Alcohol intake ( $\geq 3$ units/day) | 1.858 (0.896–3.852) | 0.096              |
| Exercise status ( $\geq 30$ min/day) | 0.780 (0.428–1.421) | 0.417              |
| Parental history of OF               | 1.432 (0.623–3.292) | 0.398              |
| Years since menopause                | 1.036 (0.989–1.085) | 0.138              |
| 25-Hydroxyvitamin D <sub>3</sub>     | 1.002 (0.983–1.021) | 0.838              |

OR, odds ratio; CI, confidence interval; OF, osteoporotic fracture.

<sup>a</sup>Values are statistically significant.
